# Supplementary material for: Exploring Candesartan, an angiotensin II receptor antagonist, as a novel inhibitor of NLRP3 inflammasome: alleviating inflammation in Neisseria gonorrhoeae infection
Source: PubMed Central journal article supplement — BMC Infect Dis. 2024 Nov 22;24:1338. doi: 10.1186/s12879-024-10208-3 (PMC11585111; doi:10.1186/s12879-024-10208-3), 2024-11-22

## Protein markers used in this study

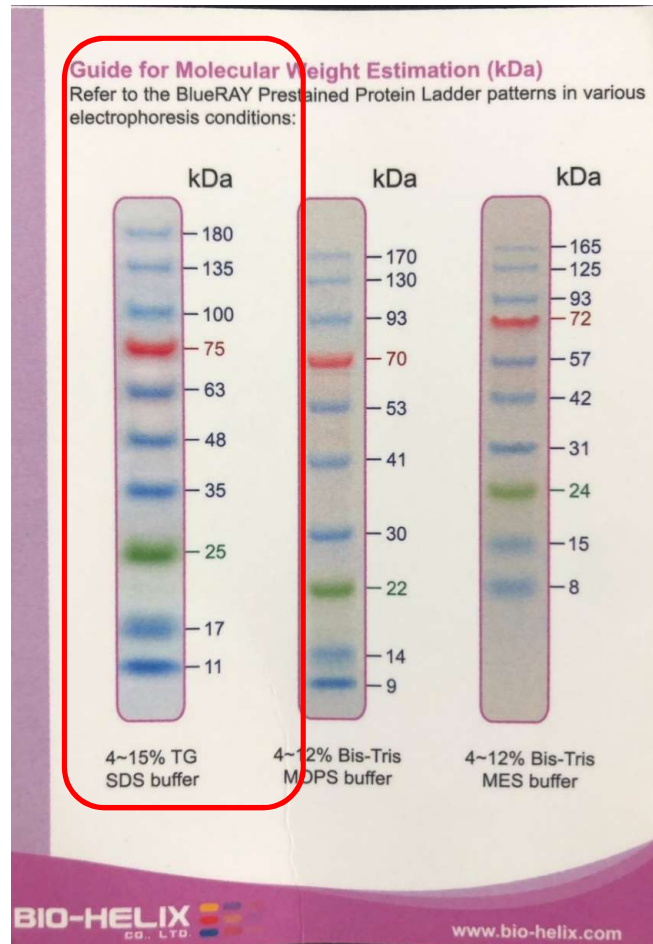

**Bio-Helix**  
**Cat. No. PM006-0500S**

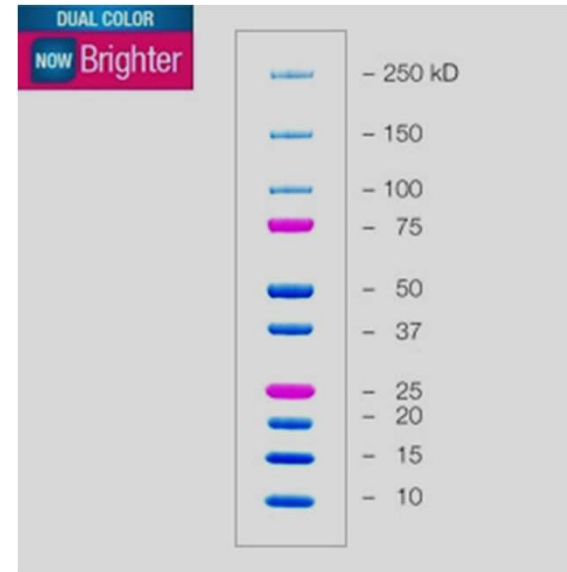

**Bio-Rad**  
**Precision Plus Protein Dual Color Standards,**  
**500  $\mu$ l #1610374**

**Fig. 1A**

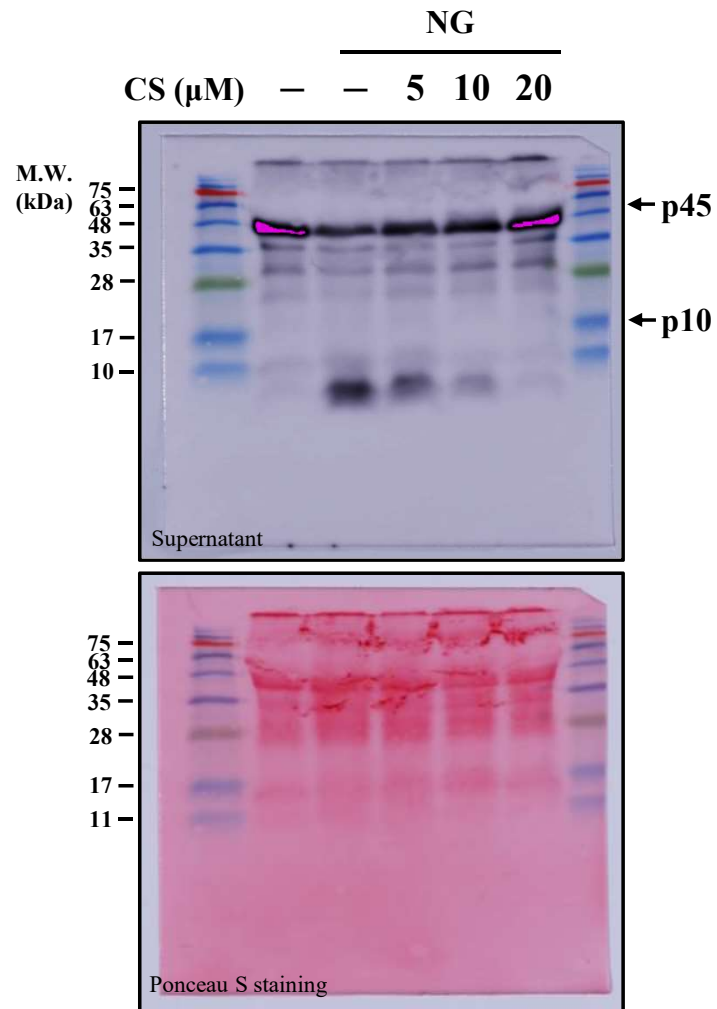

**Fig. 1B**

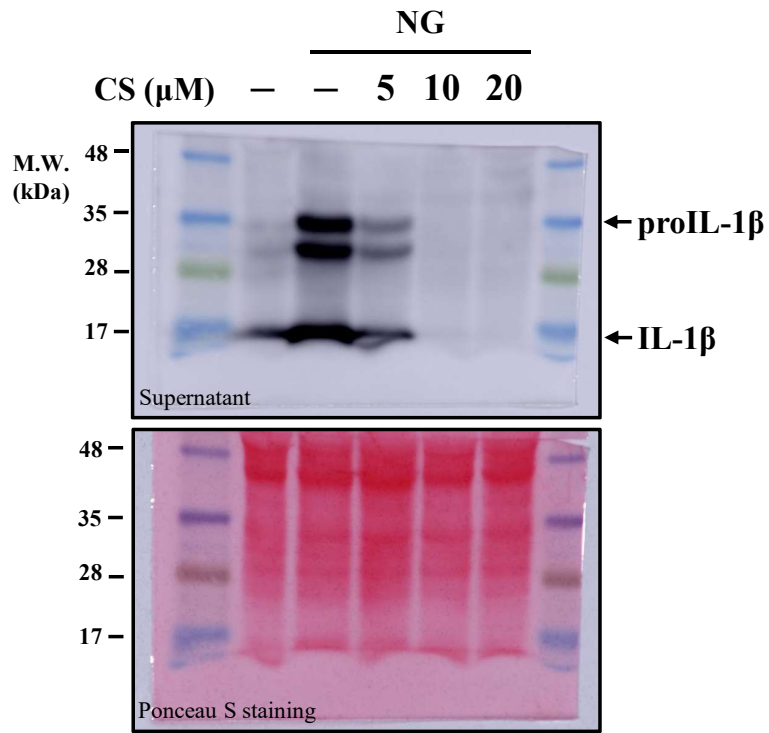

**Fig. 1E**

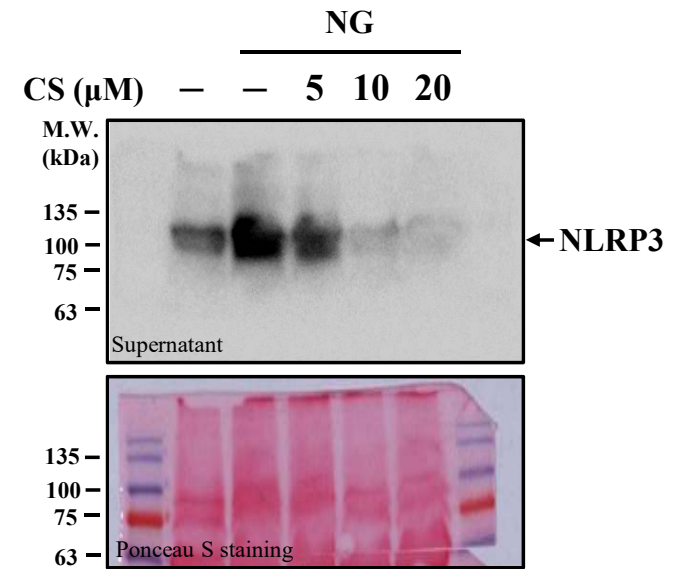

**Fig. 1E**

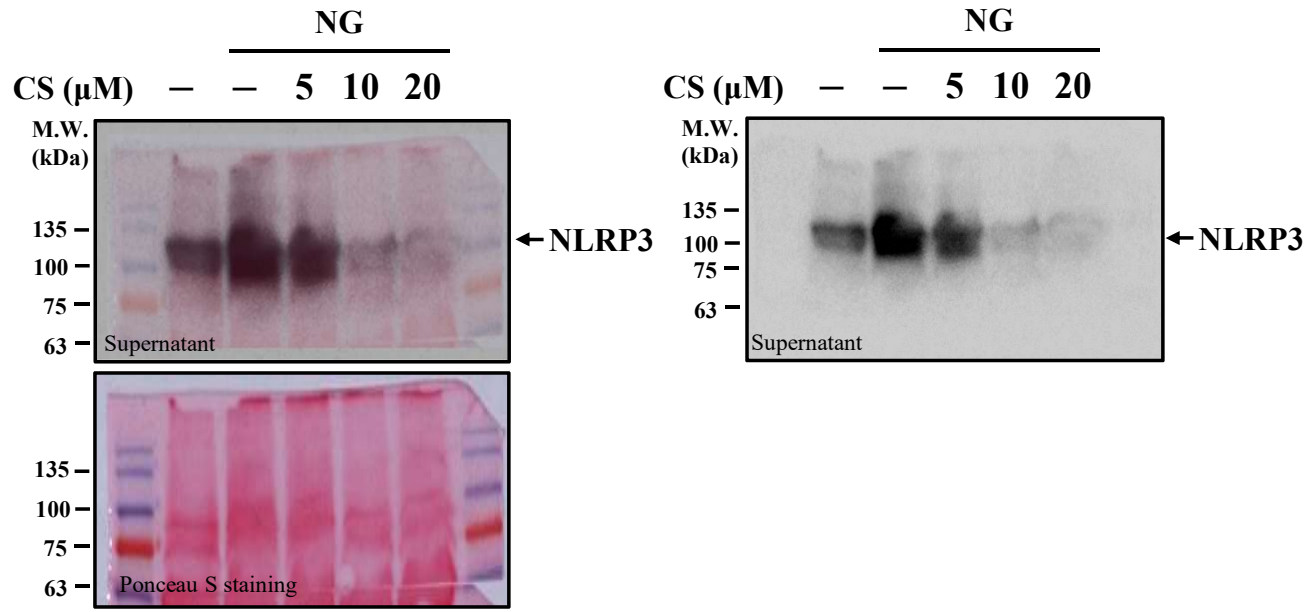

**Fig. 1F**

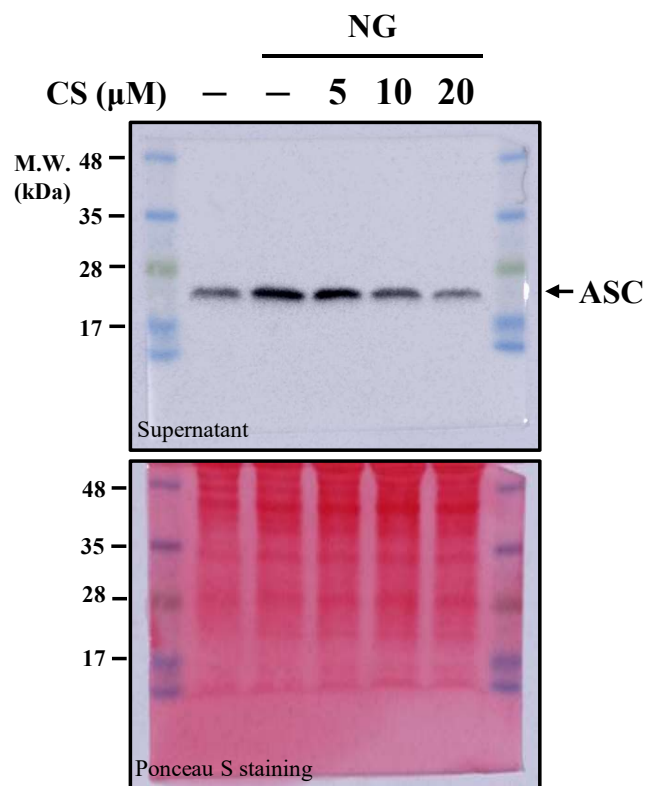

**Fig. 1G**

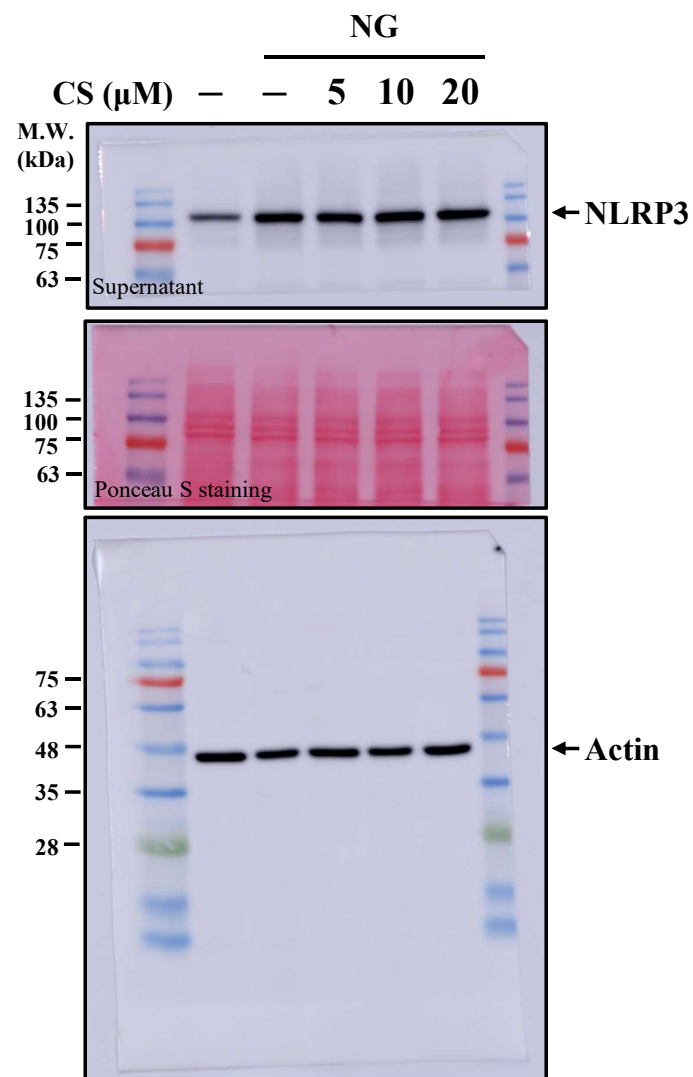

**Fig. 1H**

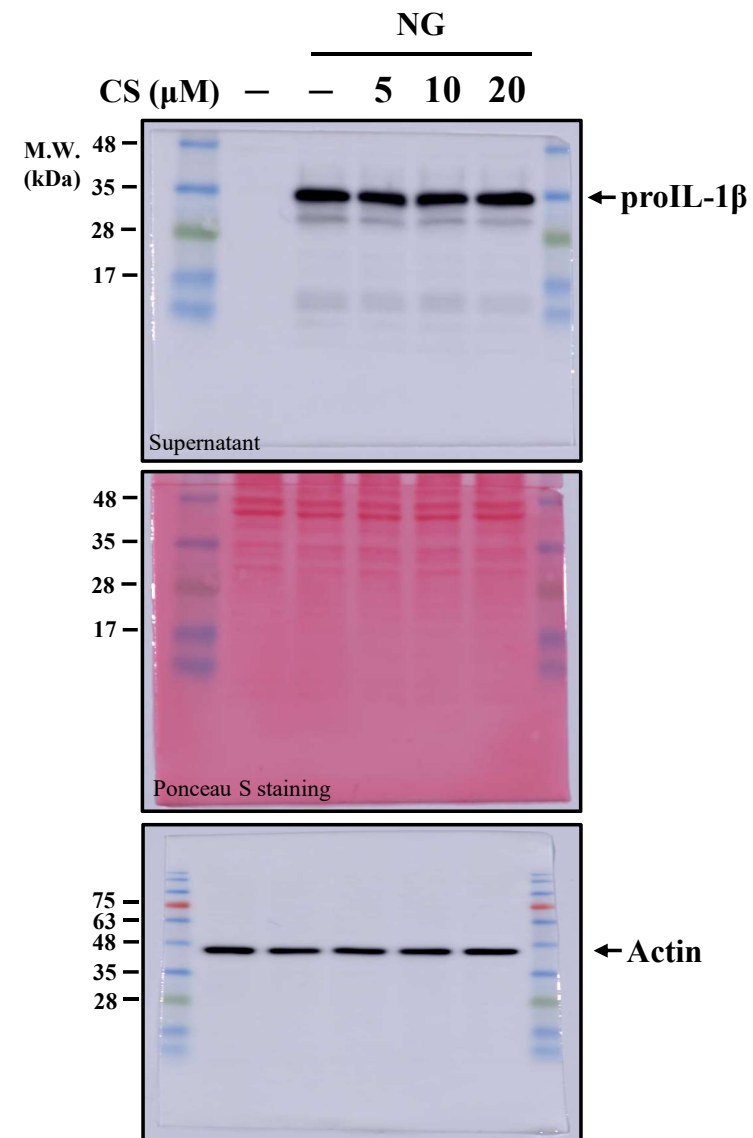

**Fig. 2G**

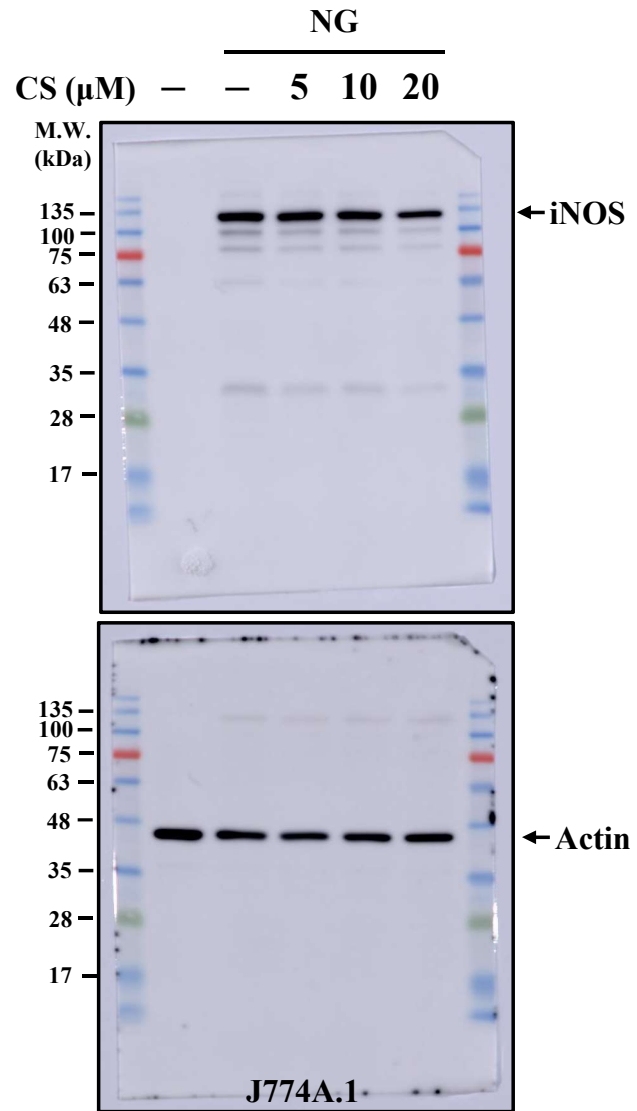

**Fig. 2H**

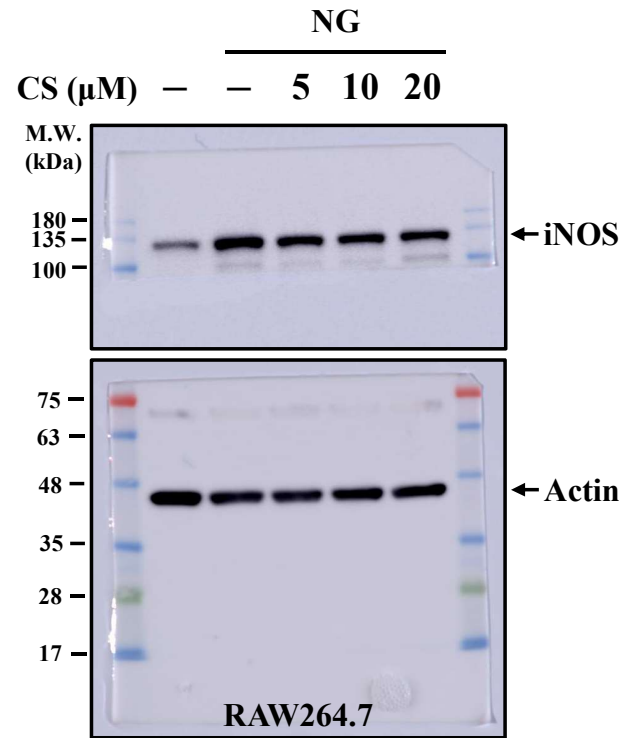

**Fig. 2I**

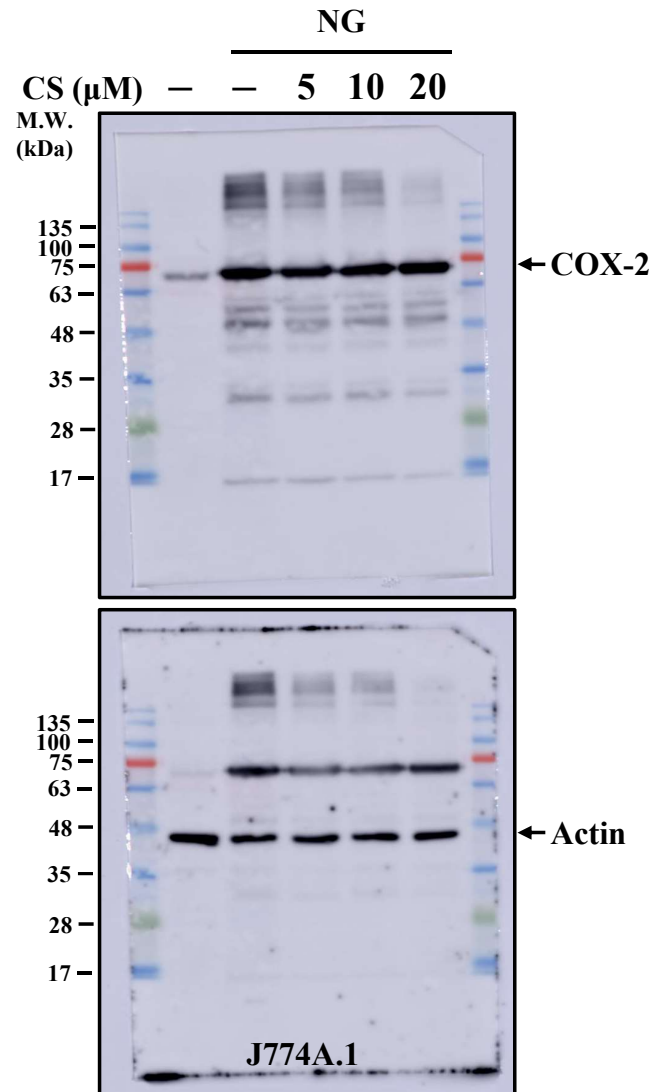

**Fig. 2J**

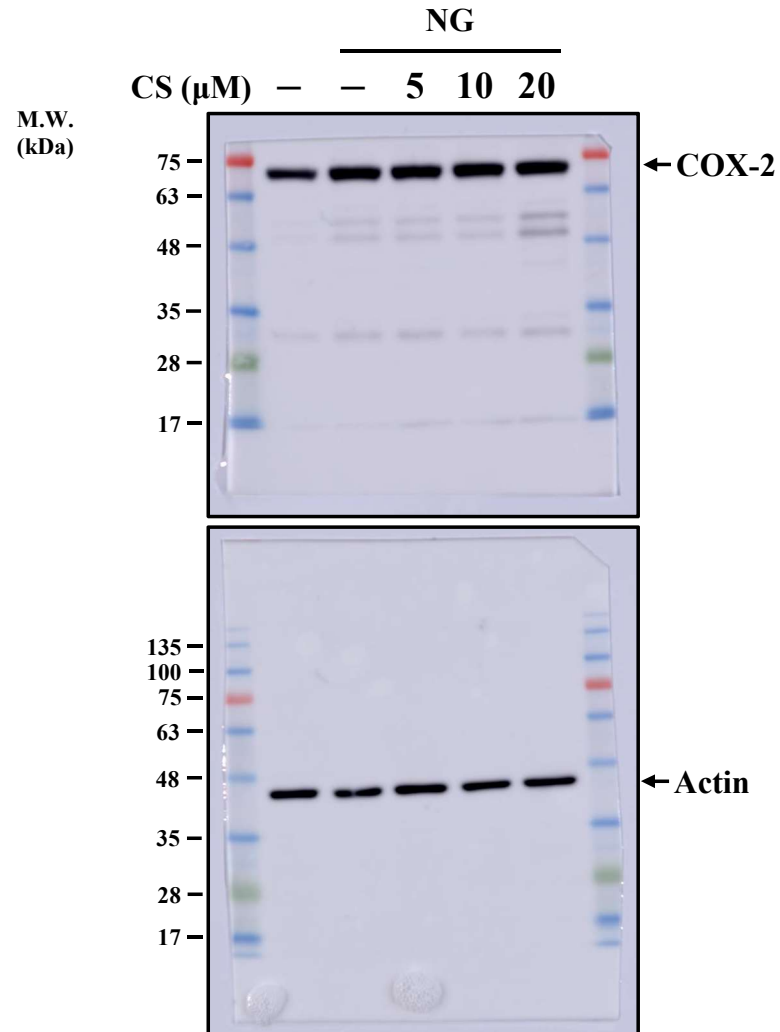

**Fig. 3B**

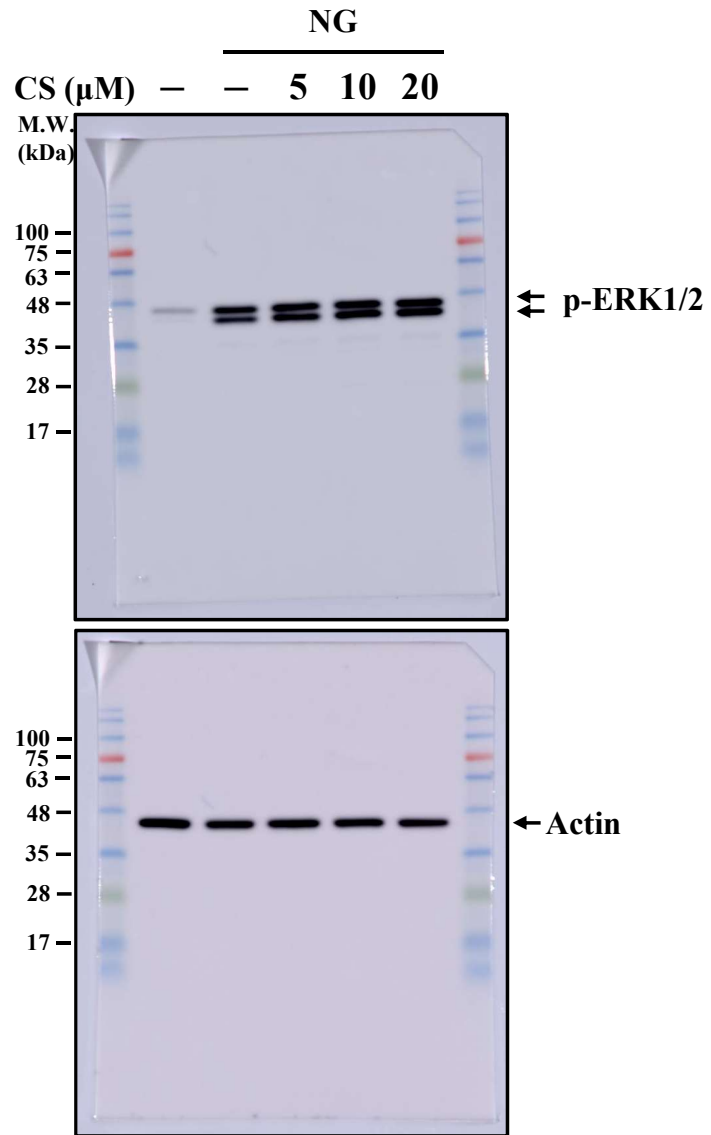

**Fig. 3C**

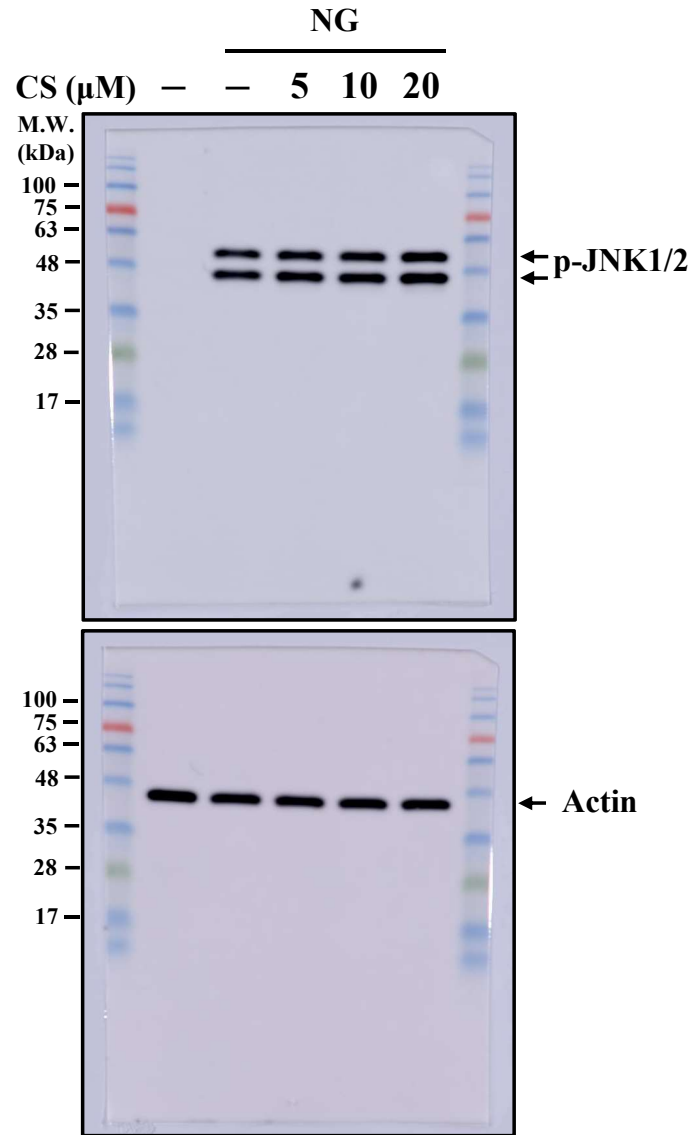

**Fig. 3D**

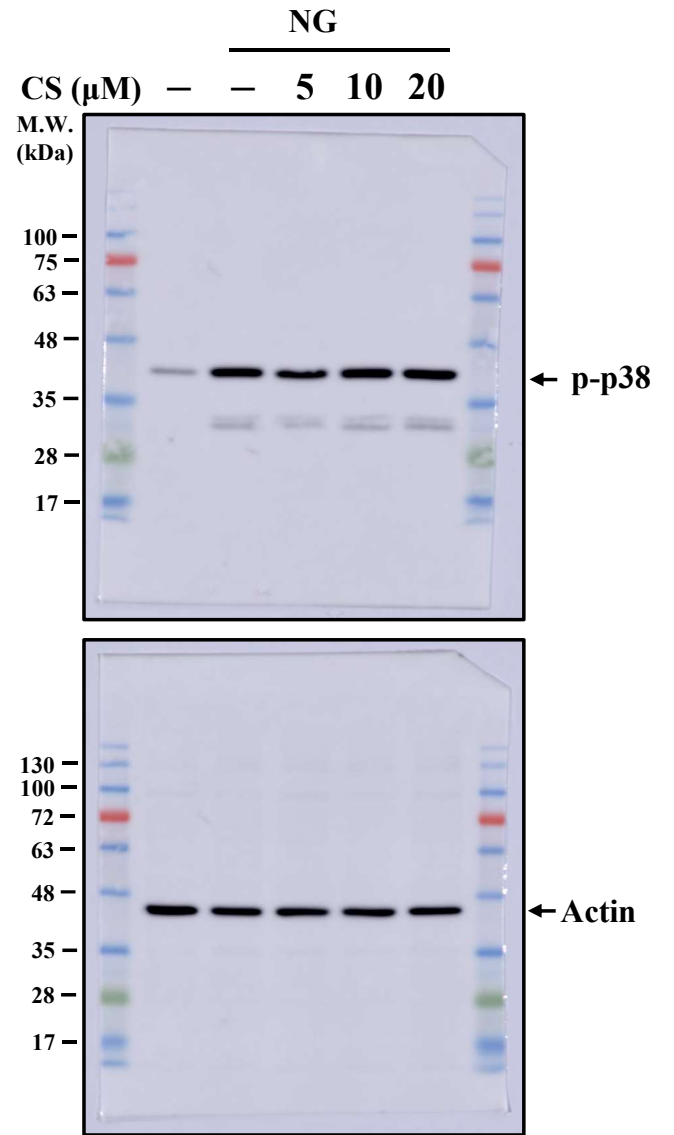

**Fig. 4A**

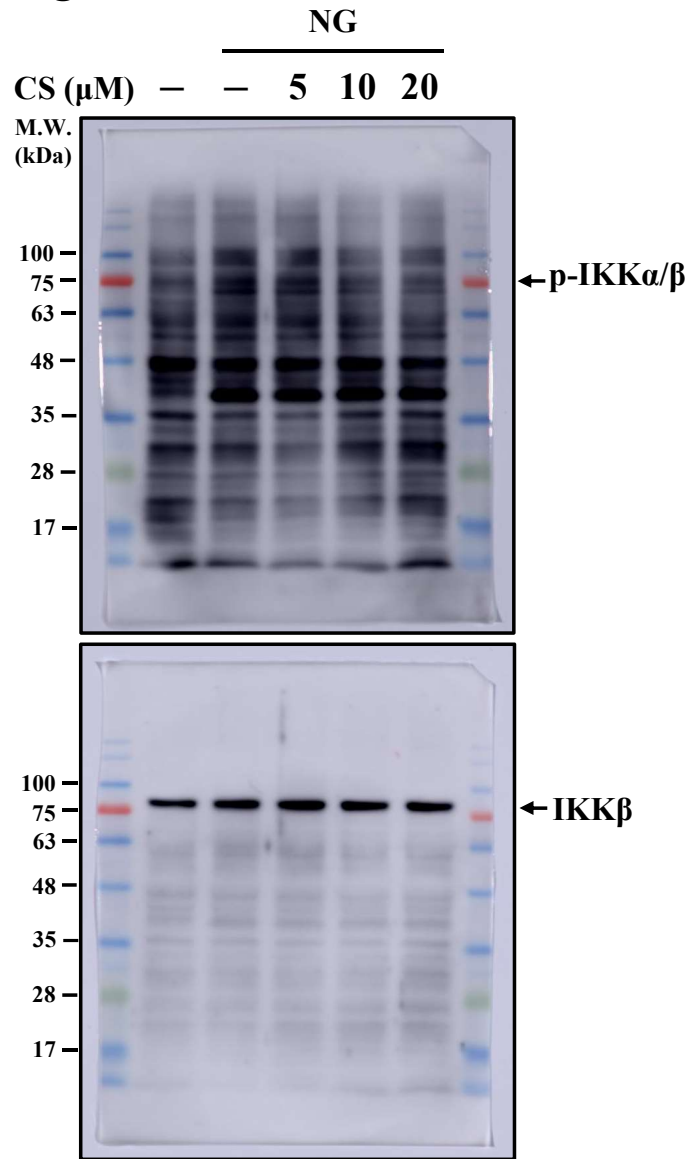

**Fig. 4B**

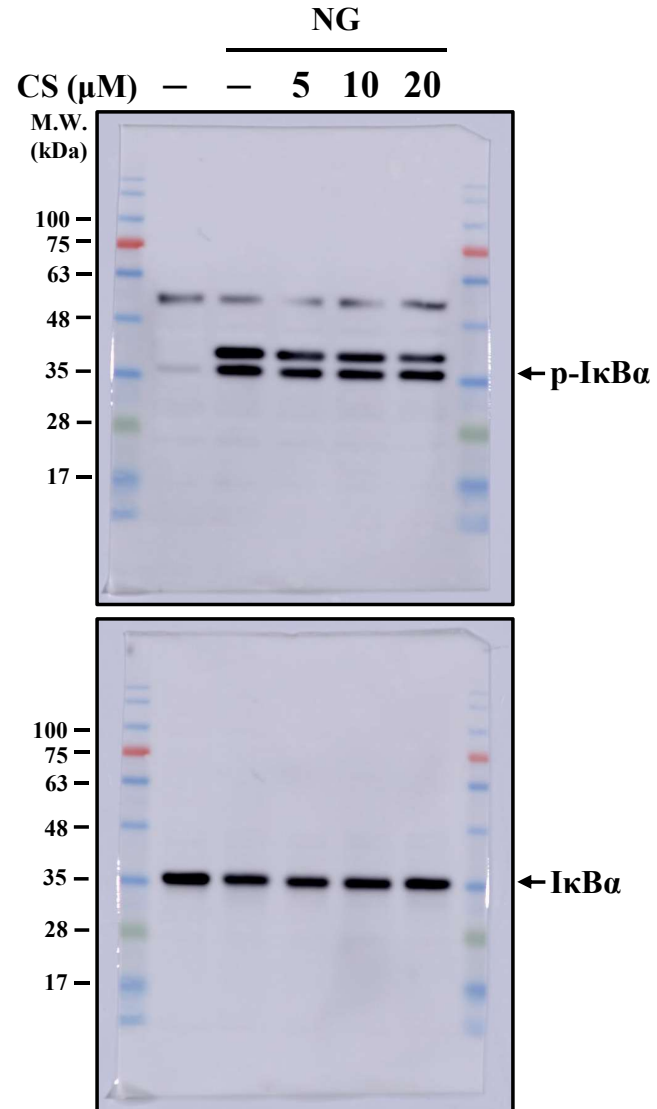



**Fig. 6B**

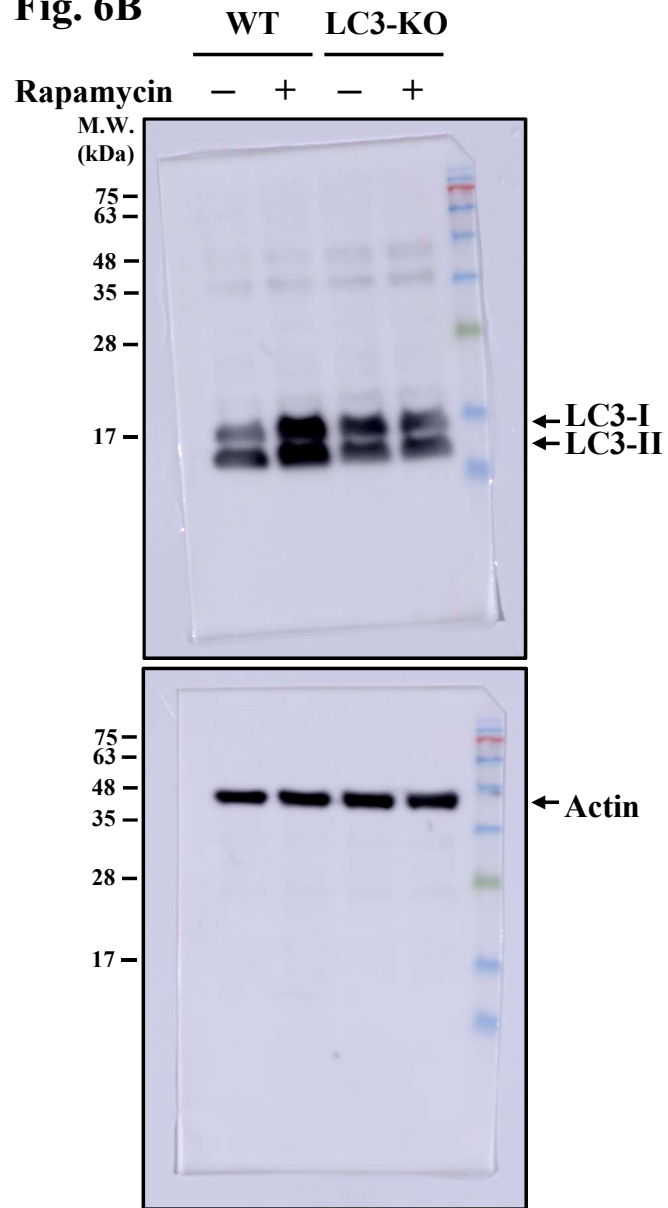

**Fig. 6D**

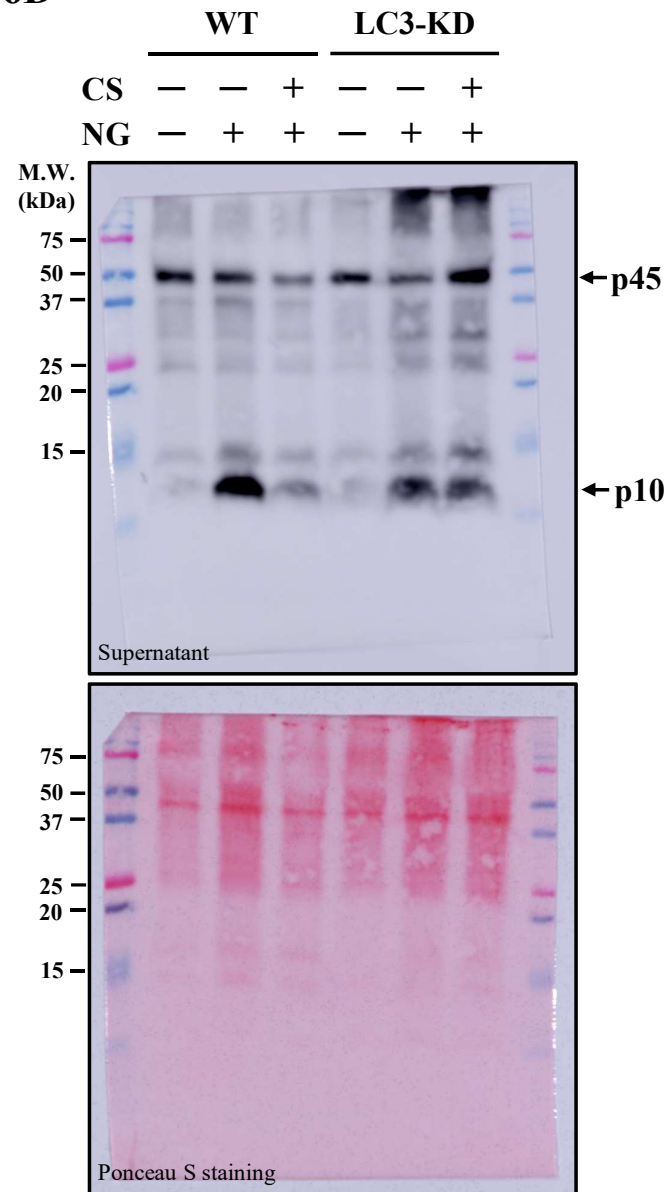

Supplement: 12879_2024_10208_MOESM1_ESM.pdf [file 12879_2024_10208_MOESM1_ESM.pdf]
